# Supplementary material for: RAPD-PCR-Based Fingerprinting Method as a Tool for Epidemiological Analysis of Trueperella pyogenes Infections
Source: MDPI journal article supplement (doi:10.3390/pathogens11050562), 2022-05-10
Supplement: s1 [file s1]

**Table S2.** Characteristic of the *T. pyogenes* strains included in this study.

| No. | Strain | Host           | Source            | Year of isolation | Geographical origin        |
|-----|--------|----------------|-------------------|-------------------|----------------------------|
| 1.  | 1/B    | cattle         | mastitis          | 2015              | Kuyavian-Pomeranian        |
| 2.  | 2/B    | cattle         | mastitis          | 2015              | Kuyavian-Pomeranian        |
| 3.  | 5/B    | cattle         | lung abscess      | 2015              | Kuyavian-Pomeranian        |
| 4.  | 6/B    | cattle         | abscess           | 2015              | Kuyavian-Pomeranian        |
| 5.  | 7/B    | cattle         | metritis          | 2015              | Kuyavian-Pomeranian        |
| 6.  | 13/B   | cattle         | metritis          | 2015              | Kuyavian-Pomeranian        |
| 7.  | 19/B   | cattle         | mastitis          | 2015              | Kuyavian-Pomeranian        |
| 8.  | 27/B   | cattle         | mastitis          | 2015              | Kuyavian-Pomeranian        |
| 9.  | 3/Z    | European bison | balanoposthitis   | 2015-16           | Bialowieza National Park   |
| 10. | 6/Z    | European bison | balanoposthitis   | 2015-16           | Bialowieza National Park   |
| 11. | 7/Z    | European bison | balanoposthitis   | 2015-16           | Bialowieza National Park   |
| 12. | 10/Z   | European bison | abscess           | 2015-16           | Bialowieza National Park   |
| 13. | 12/Z   | European bison | abscess           | 2015-16           | Bialowieza National Park   |
| 14. | 18/Z   | European bison | balanoposthitis   | 2015-16           | Bialowieza National Park   |
| 15. | 23/Z   | European bison | pneumonia         | 2015-16           | Bialowieza National Park   |
| 16. | 2/S    | pig            | pneumonia         | 2015              | Lublin Voivodeship         |
| 17. | 4/S    | pig            | pneumonia         | 2015              | Lublin Voivodeship         |
| 18. | 6/S    | pig            | heart abscess     | 2015              | Lublin Voivodeship         |
| 19. | 10/S   | pig            | pneumonia         | 2015              | Lublin Voivodeship         |
| 20. | 12/S   | pig            | liver abscess     | 2015              | Lublin Voivodeship         |
| 21. | 14/S   | pig            | join abscess      | 2015              | Lublin Voivodeship         |
| 22. | 18/S   | pig            | pneumonia         | 2015              | Lublin Voivodeship         |
| 23. | 22/S   | pig            | brain abscess     | 2015              | Lublin Voivodeship         |
| 24. | 1/K    | goat           | abscess           | 2010              | Greater Poland Voivodeship |
| 25. | 4/K    | goat           | abscess           | 2012              | Greater Poland Voivodeship |
| 26. | 20/K   | goat 1         | lung abscess      | 2015              | Greater Poland Voivodeship |
| 27. | 21/K   | goat 1         | mammary gland     | 2015              | Greater Poland Voivodeship |
| 28. | 22/K   | goat 1         | lymph node        | 2015              | Greater Poland Voivodeship |
| 29. | 54/K   | goat 1         | lymph node        | 2015              | Greater Poland Voivodeship |
| 30. | 26/K   | goat 2         | vagina abscess    | 2016              | Greater Poland Voivodeship |
| 31. | 27/K   | goat 2         | lung abscess      | 2016              | Greater Poland Voivodeship |
| 32. | 28/K   | goat 3         | lung abscess      | 2016              | Greater Poland Voivodeship |
| 33. | 30/K   | goat 3         | lung abscess      | 2016              | Greater Poland Voivodeship |
| 34. | 31/K   | goat 3         | bronchial abscess | 2016              | Greater Poland Voivodeship |
| 35. | 34/K   | goat 3         | lung abscess      | 2016              | Greater Poland Voivodeship |
| 36. | 4/O    | sheep          | abscess           | 2007              | Greater Poland Voivodeship |
| 37. | 5/O    | sheep          | Ropień kości      | 2007              | Greater Poland Voivodeship |
