# Supplementary material for: RAPD-PCR-Based Fingerprinting Method as a Tool for Epidemiological Analysis of Trueperella pyogenes Infections
Source: MDPI journal article supplement (doi:10.3390/pathogens11050562), 2022-05-10
Supplement: s1 [file s1]

**Table S1.** The values of SN<sub>L</sub> coefficient obtained for various concentrations of the tested RAPD-PCR components.

| Component concentration                |            | Number of bands ≥1 kb* | SN <sub>L</sub> | Number of bands <1 kb* | SN <sub>L</sub> | Total number of bands* | SN <sub>L</sub> |
|----------------------------------------|------------|------------------------|-----------------|------------------------|-----------------|------------------------|-----------------|
| <b>MgCl<sub>2</sub></b><br><b>(mM)</b> | <b>2.5</b> | 4...2...1              | 3.59            | 3...3...2              | 8.03            | 6...4...2              | 9.45            |
|                                        | <b>3.0</b> | 4...3...1              | 4.08            | 3...3...2              | 8.03            | 6...5...2              | 9.75            |
|                                        | <b>3.5</b> | 8...2...2              | 7.65            | 5...3...3              | 10.58           | 12...4...4             | 13.57           |
| <b>dNTPs</b><br><b>(mM)</b>            | <b>0.8</b> | 4...4...8              | 13.29           | 3...3...5              | 10.58           | 6...6...12             | 16.81           |
|                                        | <b>1.6</b> | 2...3...2              | 6.91            | 3...3...3              | 9.54            | 4...5...4              | 12.60           |
|                                        | <b>2.4</b> | 1...1...2              | 1.25            | 2...2...3              | 6.91            | 2...2...4              | 7.27            |
| <b>Primer</b>                          | <b>10</b>  | 4...1...2              | 3.59            | 3...2...3              | 8.03            | 6...2...4              | 9.45            |
| <b>M13</b>                             | <b>20</b>  | 2...4...2              | 7.27            | 3...3...3              | 9.54            | 4...6...4              | 12.93           |
| <b>(pmol)</b>                          | <b>30</b>  | 1...3...8              | 4.25            | 2...3...5              | 8.74            | 2...5...12             | 10.04           |
| <b>DNA</b><br><b>(ng)</b>              | <b>20</b>  | 4...3...2              | 8.50            | 3...3...3              | 9.54            | 6...5...4              | 13.62           |
|                                        | <b>40</b>  | 2...1...8              | 3.75            | 3...2...5              | 8.74            | 4...2...12             | 9.73            |
|                                        | <b>80</b>  | 1...4...2              | 3.59            | 2...3...3              | 8.03            | 2...6...4              | 9.45            |

\* Number of bands obtained in each of the three reactions were increased by one and these values were used directly to determine the SN<sub>L</sub> coefficient (Y).
