# Supplementary figures and images for: RAPD-PCR-Based Fingerprinting Method as a Tool for Epidemiological Analysis of Trueperella pyogenes Infections
Source: MDPI journal article supplement (doi:10.3390/pathogens11050562), 2022-05-10

### Primer RP

M 19/B 22/K 6/S 6/Z

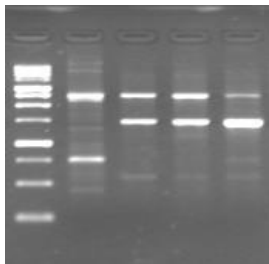

### Primer M13

M 19/B 22/K 6/S 6/Z

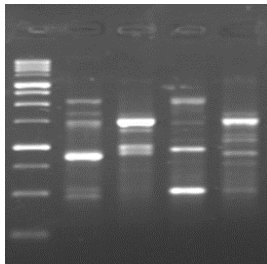

### Primer Primo2

M 19/B 22/K 6/S 6/Z

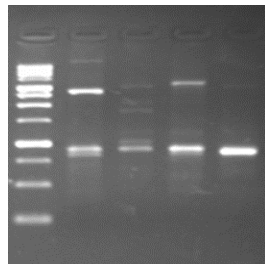

### Primer UBC245

M 19/B 22/K 6/S 6/Z

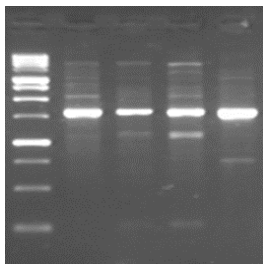

### Primer UBC282

M 19/B 22/K 6/S 6/Z

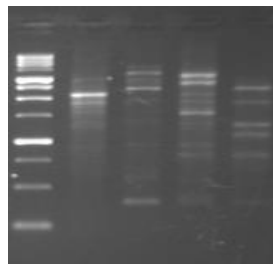

Supplement: s1 [file s1]
